# Supplementary material for: Efficient visible-light-induced hydrogen evolution from water splitting using a nanocrystalline nickel phosphide catalyst
Source: Royal Society of Chemistry journal article supplement (doi:10.1039/c5ra25286e), 2016-01-01

**Electronic Supplementary Information**  
**for**  
**Efficient visible-light-induced hydrogen evolution from water**  
**splitting using a nanocrystalline nickel phosphide catalyst**

Weiming Wu,<sup>a</sup> Xianyang Yue,<sup>a</sup> Xiao-Yuan Wu<sup>a</sup> and Can-Zhong Lu<sup>\*a</sup>

<sup>a</sup> Key Laboratory of Design and Assembly of Functional Nanostructures, Fujian  
Institute of Research on the Structure of Matter, Chinese Academy of Sciences,  
Fuzhou 350002, P. R. China

\* Corresponding author: Prof. C. Z. Lu

E-mail: [czlu@fjirsm.ac.cn](mailto:czlu@fjirsm.ac.cn)

Phone: +86-591-83705794

Fax: +86-591-83714946

Journal: RSC Advances

Number of Pages: 7

Number of Figures: 6

**Fig. S1** SEM image of the as-prepared sample.

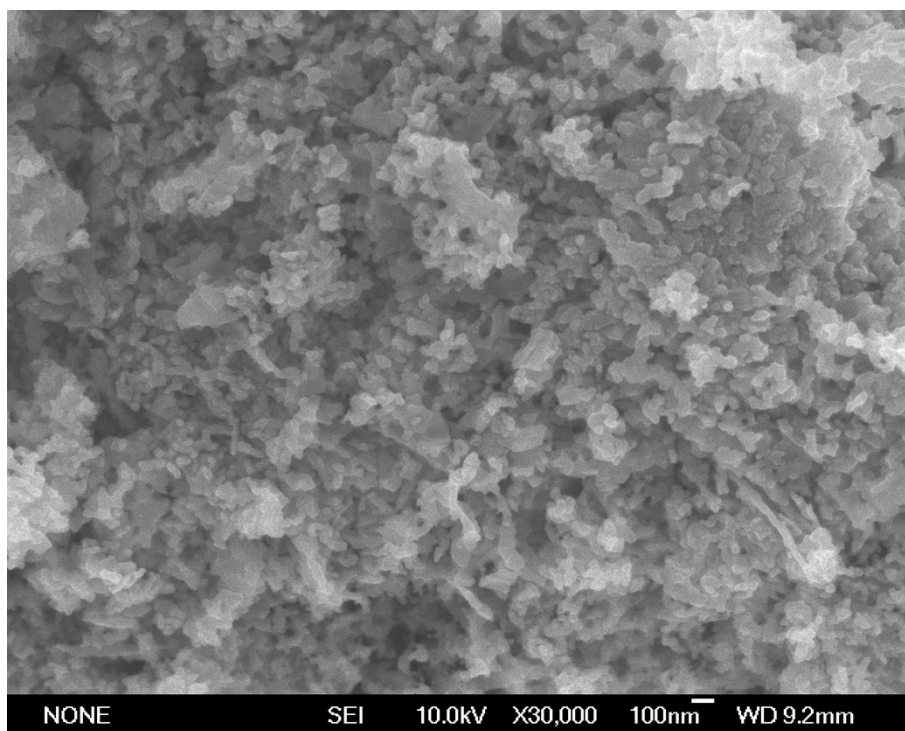

**Fig. S2** XPS survey spectrum for the obtained Ni<sub>12</sub>P<sub>5</sub> sample.

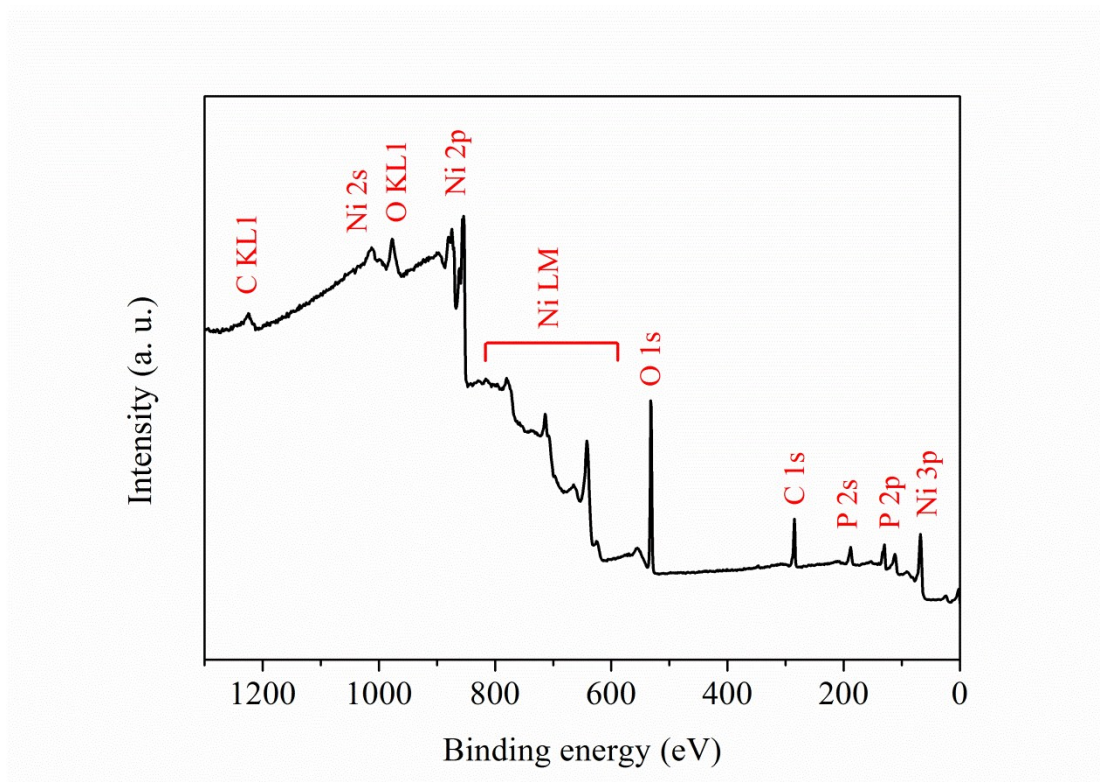

**Fig. S3** XRD pattern for NiO obtained by calcining  $\text{Ni}(\text{NO}_3)_2 \cdot 6\text{H}_2\text{O}$  at 400 °C for 2 h.

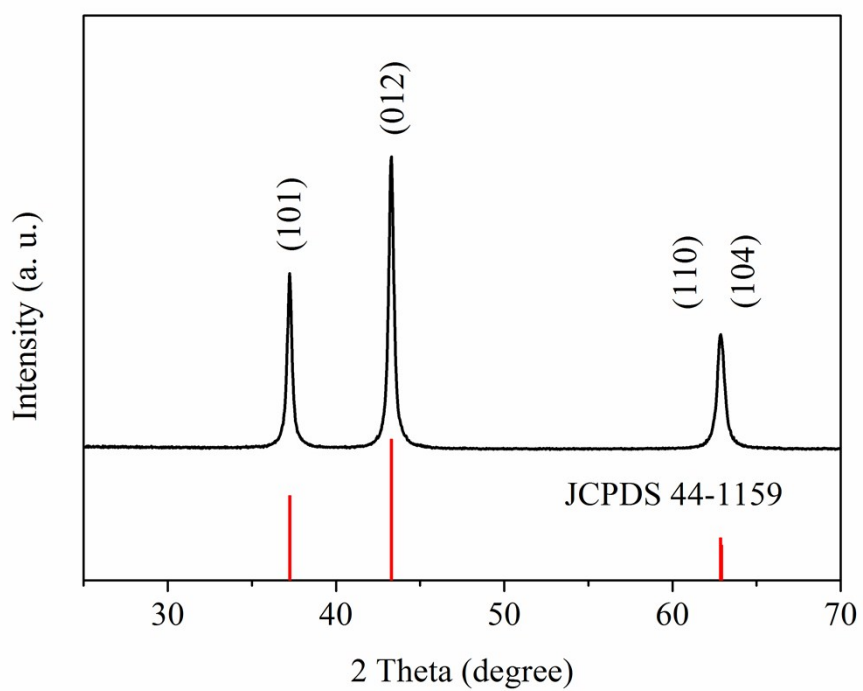

**Fig. S4** H<sub>2</sub> evolution from water splitting in the presence of the commercial Pt/C catalyst under visible light irradiation ( $\lambda \geq 420$  nm).

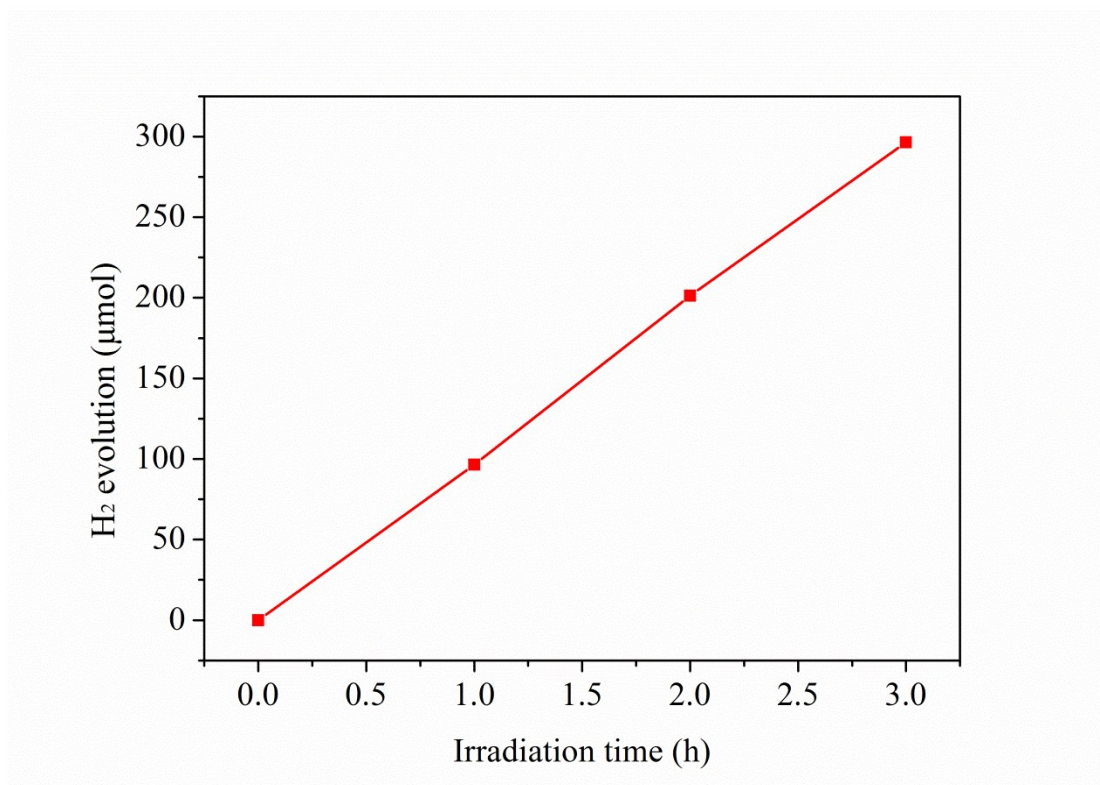

**Fig. S5** XRD patterns for the as-prepared sample before and after the catalytic reaction.

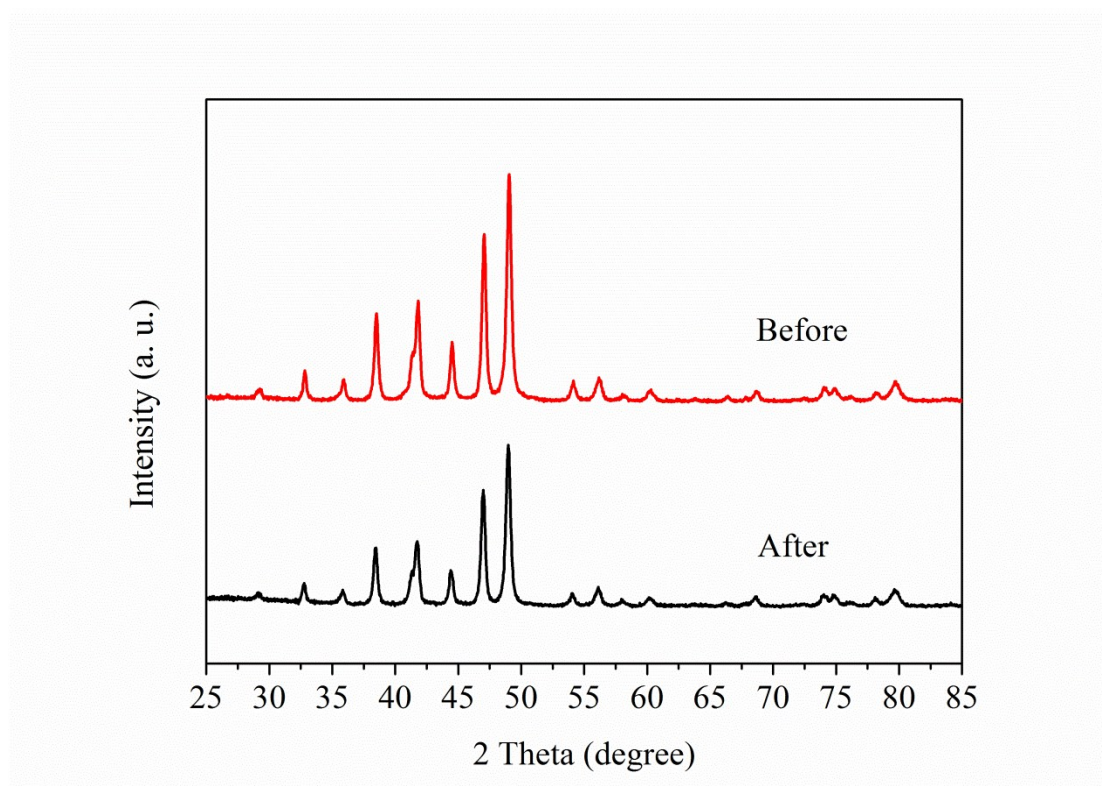

**Fig. S6** High-resolution XPS spectra of (a) Ni 2p<sub>3/2</sub> and (b) P 2p for the as-prepared sample before (solid lines) and after (dash lines) the catalytic test.

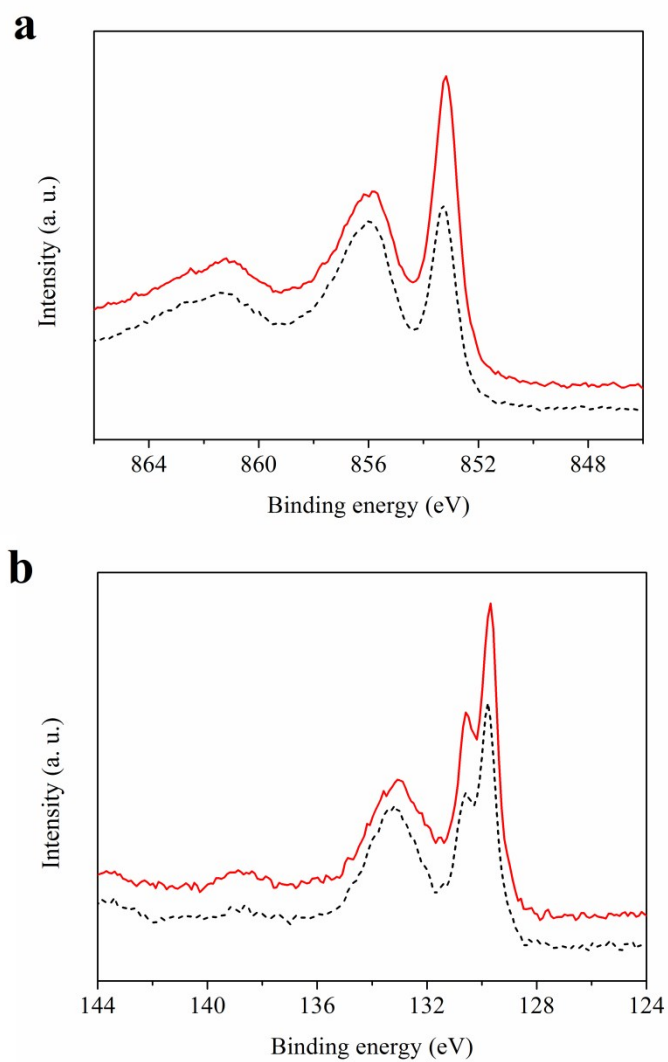

Supplement: c5ra25286e1.pdf [file c5ra25286e1.pdf]
